# Supplementary material for: Assessing branched tetraether lipids as tracers of soil organic carbon transport through the Carminowe Creek catchment (southwest England)
Source: Copernicus journal article supplement (doi:10.5194/bg-17-3183-2020), 2020-06-24
Supplement: Supplementary file 1 [file bg-17-3183-2020-supplement.zip]

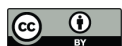

## *Supplement of*

# **Assessing branched tetraether lipids as tracers of soil organic carbon transport through the Carminowe Creek catchment (southwest England)**

**Jingjing Guo et al.**

*Correspondence to:* Jingjing Guo (j.guo@uu.nl)

- bg-17-3183-2020-supplement-title-page.pdf
- \_\_MACOSX
  - supplements
    - \* .\_DS\_Store
    - \* .\_Guo et al., Assessing branched tetraether lipids as tracers of soil organic carbon transport through the Carminowe Creek catchment (southwest England)\_supplementary\_revised.xlsx
- supplements
  - .DS\_Store
  - Guo et al., Assessing branched tetraether lipids as tracers of soil organic carbon transport through the Carminowe Creek catchment (southwest England)\_supplementary\_revised.xlsx

The copyright of individual parts of the supplement might differ from the CC BY 4.0 License.
